# Supplementary material
Source: PubMed Central journal article supplement (PMC4264934)
Supplement: embr0015-1315-sd1.pdf [file embr0015-1315-sd1.pdf]

# Supplementary Fig S1

## S1A

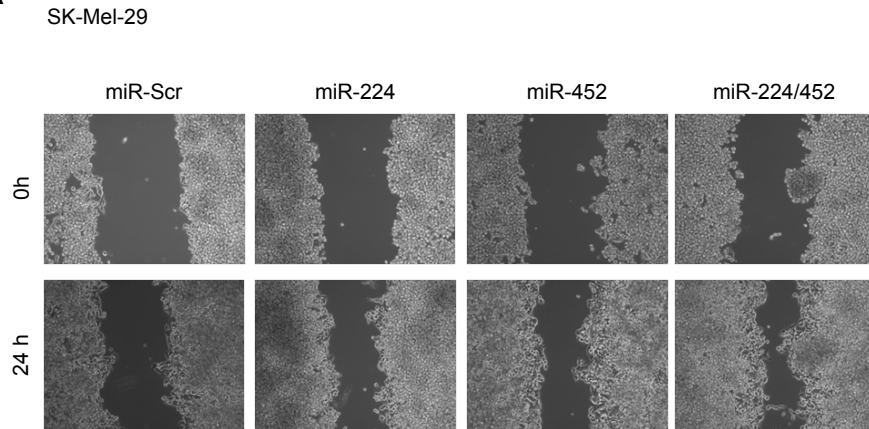

## S1B

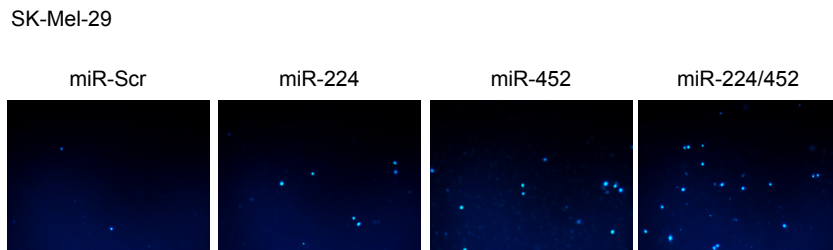

**Figure S1.** Representative pictures of migration (A) and invasion assays (B) in stable miR-224/452-expressing SK-Mel-29 cells.
