# Supplementary material
Source: PubMed Central journal article supplement (PMC4264934)
Supplement: embr0015-1315-sd2.pdf [file embr0015-1315-sd2.pdf]

# Supplementary Fig S2

## S2A

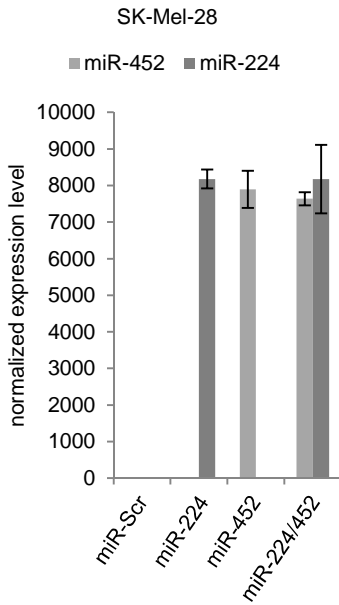

## S2B

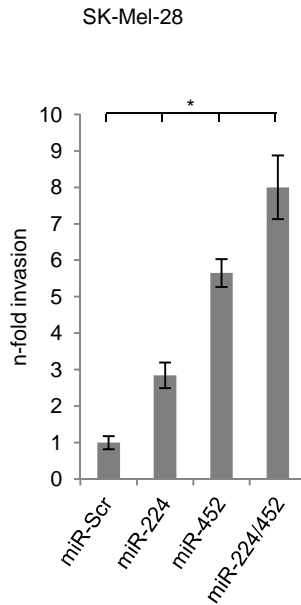

SK-Mel-28

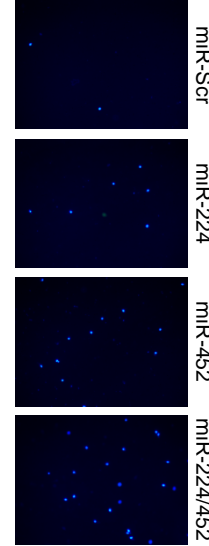

## S2C

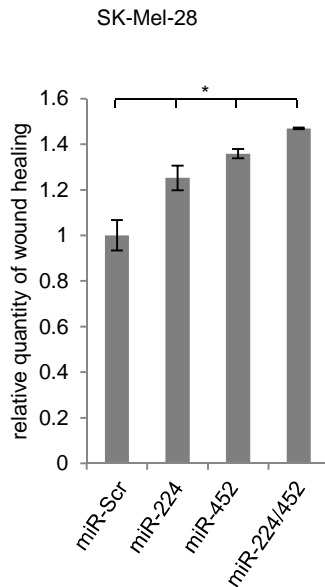

SK-Mel-28

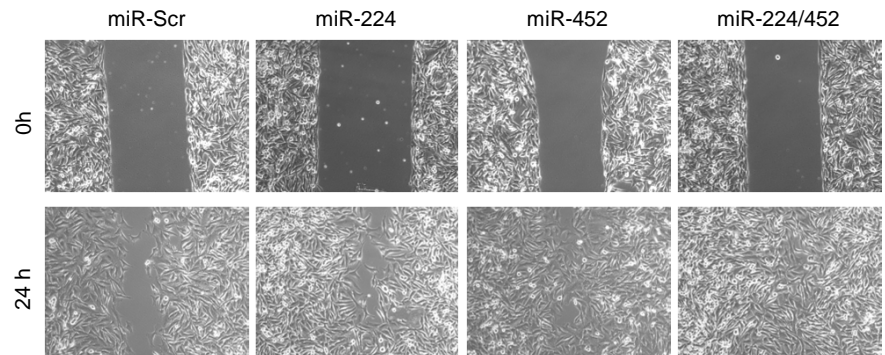

**Figure S2.** (A) Stable expression of miR-224/-452 was verified by TaqMan® MicroRNA single assays. (B-C) Overexpression of miR-224 and -452 induced typical invasive and migratory properties in less aggressive SK-Mel-28 cells shown by Boyden chamber and scratch assay, respectively. Data information: Bar graphs are represented as means  $\pm$  SD,  $n = 3$  (A,C) or  $n = 5$  (B),  $*P \leq 0.05$ , two-sided Student's t-test.
