# Supplementary material
Source: PubMed Central journal article supplement (PMC4264934)
Supplement: embr0015-1315-sd3.pdf [file embr0015-1315-sd3.pdf]

# Supplementary Fig S3

## S3A

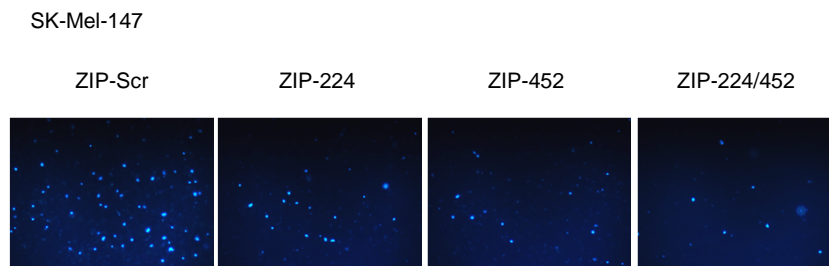

## S3B

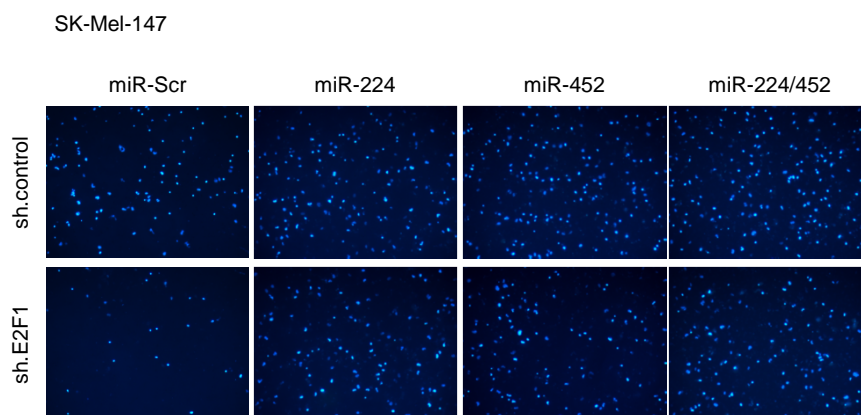

## S3C

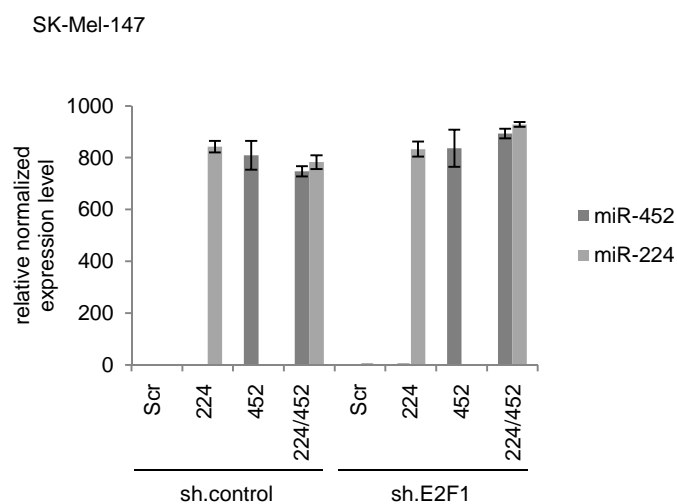

**Figure S3.** Representative images of invasion assays in SK-Mel-147 depleted for miR-224/452 (A), or treated with shE2F1 alone or in combination with miR-224/452 (B). (C) MiR-224/452 level after re-expression in E2F1-ablated and control cells. Data information: Bar graphs are represented as means  $\pm$  SD, n = 3.
