# Supplementary material
Source: PubMed Central journal article supplement (PMC4264934)
Supplement: embr0015-1315-sd5.pdf [file embr0015-1315-sd5.pdf]

# Supplementary Fig S5

## S5A

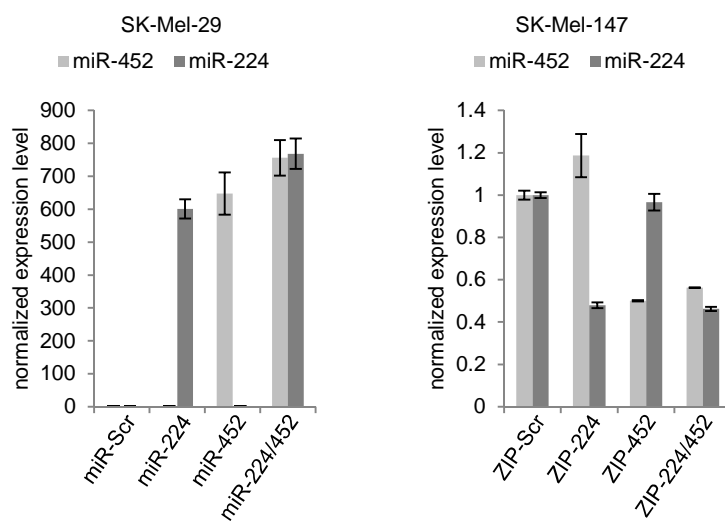

**Figure S5.** (A) MiR-224/452 levels after overexpression in SK-Mel-29 (left) or knockdown in SK-Mel-147 cells. Data information: Bar graphs are represented as means  $\pm$  SD, n = 3.
