# Supplementary material
Source: PubMed Central journal article supplement (PMC4264934)
Supplement: embr0015-1315-sd6.pdf [file embr0015-1315-sd6.pdf]

# Supplementary Fig S6

**S6A**

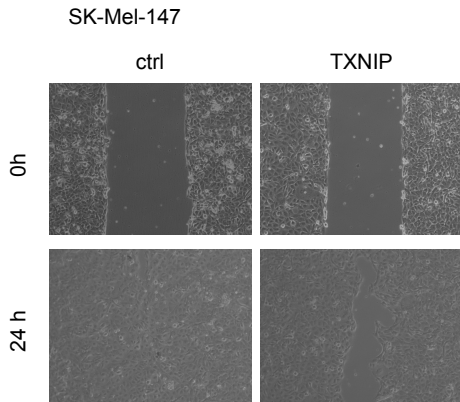

**S6C**

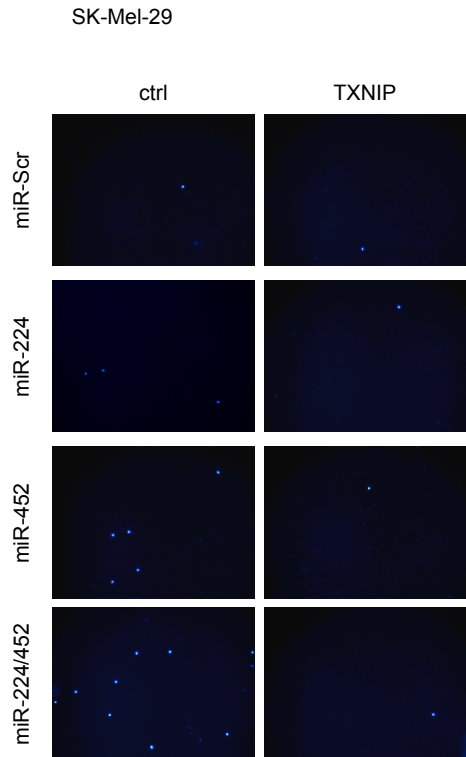

**S6B**

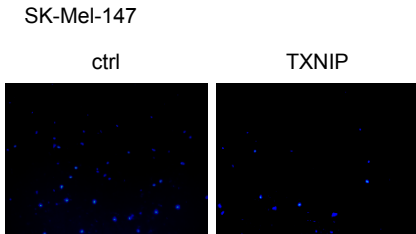

**Figure S6.** Representative illustrations of migration and invasion assays in TXNIP-expressing SK-Mel-147 cells (A,B) or SK-Mel-29 cells overexpressing miR-224/452 and TXNIP (C).
