# Supplementary material
Source: PubMed Central journal article supplement (PMC4264934)
Supplement: embr0015-1315-sd7.pdf [file embr0015-1315-sd7.pdf]

# Supplementary Fig S7

## S7A

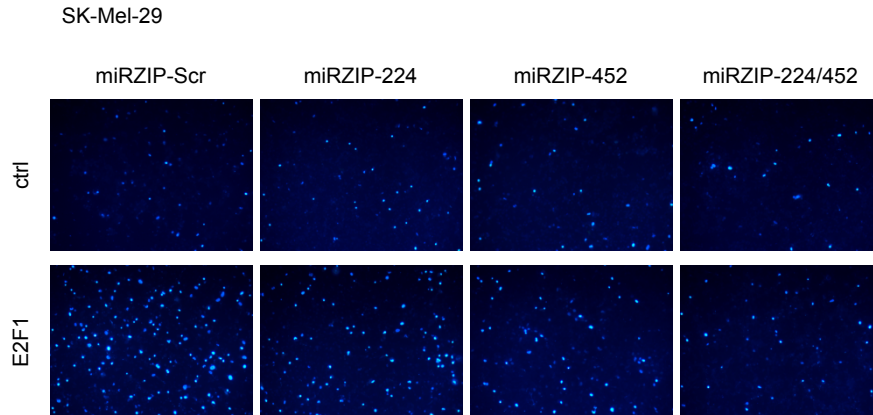

## S7B

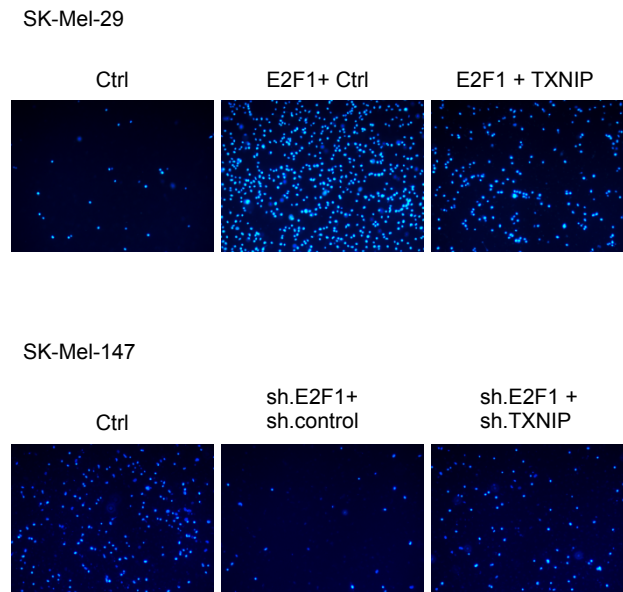

**Figure S7.** Migratory/invasive behavior of miR-depleted SK-Mel-29 cells w/o E2F1 (A), or parental SK-Mel-29 overexpressing E2F1+TXNIP (B) or SK-Mel-147 lacking both factors (C).
