# Supplementary material
Source: PubMed Central journal article supplement (PMC4264934)
Supplement: embr0015-1315-sd8.pdf [file embr0015-1315-sd8.pdf]

# Supplementary Table S1

|    | Gene Symbol | Protein name                                     | Relevant GO terms                                                                                                                                                                                                                                                                                                                                                                                                                   |
|----|-------------|--------------------------------------------------|-------------------------------------------------------------------------------------------------------------------------------------------------------------------------------------------------------------------------------------------------------------------------------------------------------------------------------------------------------------------------------------------------------------------------------------|
| 1  | RNF145      | ring finger protein 145                          |                                                                                                                                                                                                                                                                                                                                                                                                                                     |
| 2  | HNRNPUL1    | heterogeneous nuclear ribonucleoprotein U-like 1 |                                                                                                                                                                                                                                                                                                                                                                                                                                     |
| 3  | GID4        | GID complex subunit 4                            |                                                                                                                                                                                                                                                                                                                                                                                                                                     |
| 4  | DNAJC8      | DnaJ (Hsp40) homolog, subfamily C, member 8      |                                                                                                                                                                                                                                                                                                                                                                                                                                     |
| 5  | MINPP1      | multiple inositol-polyphosphate phosphatase 1    |                                                                                                                                                                                                                                                                                                                                                                                                                                     |
| 6  | LIN7C       | lin-7 homolog C (C. elegans)                     | cell-cell junction                                                                                                                                                                                                                                                                                                                                                                                                                  |
| 7  | TRA2B       | transformer 2 beta homolog (Drosophila)          |                                                                                                                                                                                                                                                                                                                                                                                                                                     |
| 8  | TXNIP       | thioredoxin interacting protein                  | cell cycle; cellular response to tumor cell; negative regulation of cell division; positive regulation of apoptotic process; regulation of cell proliferation; response to drug; response to oxidative stress                                                                                                                                                                                                                       |
| 9  | HNRNPA3     | heterogeneous nuclear ribonucleoprotein A3       |                                                                                                                                                                                                                                                                                                                                                                                                                                     |
| 10 | ADAM10      | ADAM metallopeptidase domain 10                  | cell-cell signaling; epidermal growth factor receptor signaling pathway; negative regulation of cell adhesion; positive regulation of cell growth; positive regulation of cell migration; positive regulation of cell proliferation; response to tumor necrosis factor                                                                                                                                                              |
| 11 | CDV3        | CDV3 homolog (mouse)                             | cell proliferation                                                                                                                                                                                                                                                                                                                                                                                                                  |
| 12 | PHF6        | PHD finger protein 6                             |                                                                                                                                                                                                                                                                                                                                                                                                                                     |
| 13 | DPYSL2      | dihydropyrimidinase-like 2                       | response to drug                                                                                                                                                                                                                                                                                                                                                                                                                    |
| 14 | NRAS        | neuroblastoma RAS viral (v-ras) oncogene homolog | epidermal growth factor receptor signaling pathway; positive regulation of cell proliferation                                                                                                                                                                                                                                                                                                                                       |
| 15 | RAD23B      | RAD23 homolog B (S. cerevisiae)                  | response to DNA damage stimulus; spermatogenesis                                                                                                                                                                                                                                                                                                                                                                                    |
| 16 | UBE2D3      | ubiquitin-conjugating enzyme E2D 3               | apoptotic process; DNA repair                                                                                                                                                                                                                                                                                                                                                                                                       |
| 17 | DEGS1       | delta(4)-desaturase, sphingolipid 1              |                                                                                                                                                                                                                                                                                                                                                                                                                                     |
| 18 | PPAP2B      | phosphatidic acid phosphatase type 2B            | canonical Wnt receptor signaling pathway; cell adhesion                                                                                                                                                                                                                                                                                                                                                                             |
| 19 | PRPF4B      | pre-mRNA processing factor 4B                    |                                                                                                                                                                                                                                                                                                                                                                                                                                     |
| 20 | CDKN1B      | cyclin-dependent kinase inhibitor 1B (p27, Kip1) | cell cycle arrest; DNA damage response, signal transduction by p53 class mediator resulting in cell cycle arrest; ; epidermal growth factor receptor signaling pathway; negative regulation of apoptotic process; negative regulation of cell growth; negative regulation of cell proliferation; negative regulation of epithelial cell proliferation; positive regulation of cell death; positive regulation of cell proliferation |
