# Supplementary material
Source: PubMed Central journal article supplement (PMC4264934)
Supplement: embr0015-1315-sd9.pdf [file embr0015-1315-sd9.pdf]

# Supplementary Table S2

|                      |                                 |
|----------------------|---------------------------------|
| E2F1 fwd             | 5'-GCTGGACCACCTGATGAATATCT-3'   |
| E2F1 rev             | 5'-GGAGGGGCTTTGATCACCATAA-3'    |
| TXNIP fwd            | 5'-TCATGGTGATGTTCAAGAAGATC-3'   |
| TXNIP Rev            | 5'-ACTTCACACACCTCCACTATC-3'     |
| Actin fwd            | 5'-CGGGAAATCGTGCGTGACATTA-3'    |
| Actin rev            | 5'-ACCGCTCATTGCCAATGGTGAT-3'    |
| GABRE fwd            | 5'-AAACTCCGCCATCCTCGTATCAAT-3'  |
| GABRE rev            | 5'-GTGCAAGCGTTTTAAGAAGTACTT-3'  |
|                      |                                 |
| <b>cloning</b>       |                                 |
| GABRE promoter fwd   | 5'-TGCCAAGTCTCCAGAAAGATTCCGG-3' |
| GABRE promoter rev   | 5'-CTTTTGCTGGGCTCCAACTTTCAC-3'  |
| TXNIP cloning fwd    | 5'-ATGGTGATGTTCAAGAAGATCAAG-3'  |
| TXNIP cloning rev    | 5'-TGCACATTGTTGTTGAGGATGCA-3'   |
| TXNIP-3'UTR fwd      | 5'-GTCTCTCTTCCTGGACACTCA-3'     |
| TXNIP-3'UTR rev      | 5'-GAACACAGGGTTCGGCATC-3'       |
| miR-224 fwd          | 5'-CGGGGACTCTGGGGAAGC-3'        |
| miR-224 rev          | 5'-GTAGCAGGCTACCACTGCAT-3'      |
| miR-452 fwd          | 5'-CTCACAACCCAGTTGGTAA-3'       |
| miR-452 rev          | 5'-AGAACTCACACGAGCTCCAT-3'      |
| miR-224+452 fwd      | 5'-CACAGGAGTGAGCAACAAAAC-3'     |
| miR-224+452 rev      | 5'-CCCAACTGGAAGAGTTTGAG-3'      |
|                      |                                 |
| <b>ChIP</b>          |                                 |
| GABRE E2F-site 1 fwd | 5'-CTCTATTCCAGTTGGTCCCTCTCA-3'  |
| GABRE E2F-site 1 rev | 5'-AGGCGGAGACATTCCTGGAGA-3'     |
| GABRE E2F-site 2 fwd | 5'-AAGCAATGGGGTGCAACAGGT-3'     |
| GABRE E2F-site 2 rev | 5'-ACAAGATGTGGGGCTGGATGTG-3'    |
