# Supplementary material
Source: PubMed Central journal article supplement (PMC4264934)
Supplement: embr0015-1315-sd10.pdf [file embr0015-1315-sd10.pdf]

Manuscript EMBOR-2014-39392

## **E2F1 induces miR-224/452 expression to drive EMT through TXNIP downregulation**

Susanne Knoll, Katharina Fürst, Bhavani Kowtharapu, Ulf Schmitz, Stephan Marquardt, Olaf Wolkenhauer, Hubert Martin and Brigitte M Pützer

*Corresponding author: Brigitte M Pützer, Rostock University Medical Center*

---

### **Review timeline:**

Submission date:

01 September 2014

Accepted:

19 September 2014

---

### **Transaction Report:**

No Peer Review Process File is available with this article, as the authors have chosen not to make the review process public in this case.
